# Supplementary material for: Deep learning enables the differentiation between early and late stages of hip avascular necrosis
Source: Springer Nature journal article supplement (doi:10.1007/s00330-023-10104-5), 2023-08-15

**Supplementary Figure 1.** Plots presenting the training/validation accuracy (A,C,E) and training/validation loss (B,D,F) for the finetuning of the final trainable layers of VGG-16 (A,B), Inception ResnetV2 (C,D), and Inception V3 (E,F).

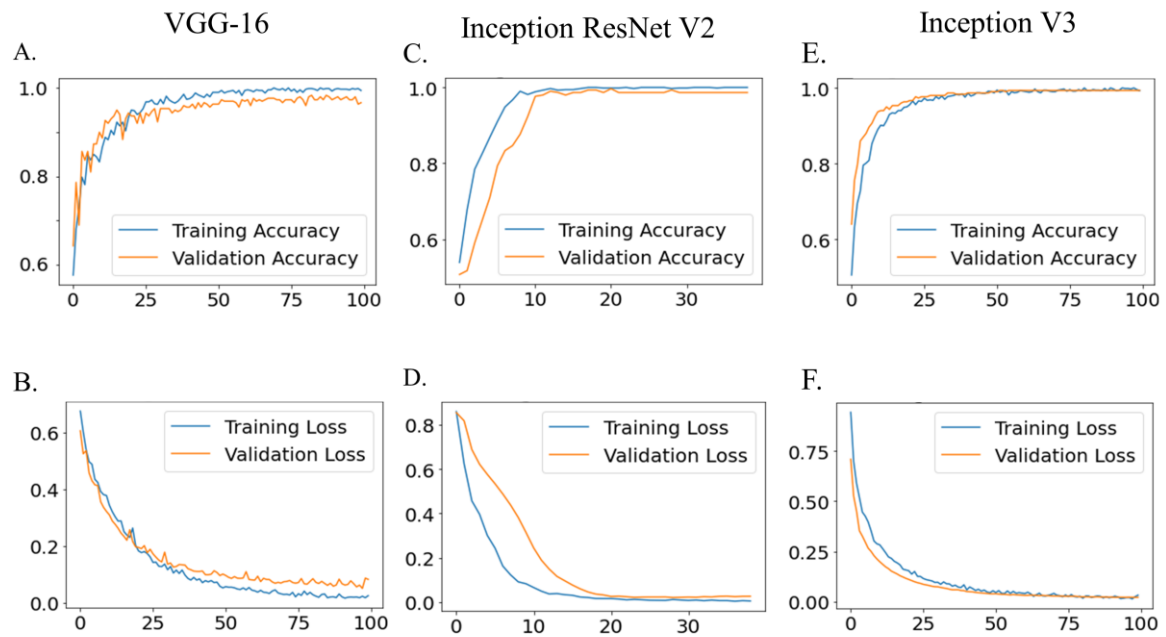

Supplement: MOESM1 [file 330_2023_10104_MOESM1_ESM.pdf]
